# Supplementary material for: Differential Effects of Post-Weaning Diet and Maternal Obesity on Mouse Liver and Brain Metabolomes
Source: MDPI journal article supplement (doi:10.3390/nu12061572), 2020-05-28

# Supplementary table T1 : Phenotypic characteristics of the male mice for the whole population and for the 6 selected individuals per group.

The grey lines recall the statistical analyses for the whole group population, as described in Panchenko et al, Nutrients, 2019, and the white lines give those for the 6 individuals per group, as selected with the method described in supplementary figure 1 below.

For all the metabolic parameters, the p-values on the selected individuals show the same level of significance than for the whole population (in red). For behavioral parameters, the significance between HFD and CD is not reached for the hidden cheese test for the selected individuals, although it follows the same tendency (in orange).

NS: non-significant.

|                                                                     | Metabolic parameters   |                 |                 |                 |                 |                                                                |                           |                                         |                 |                          |                          |                 |                              |                    | Behavioural parameters     |                        |                      |                    |
|---------------------------------------------------------------------|------------------------|-----------------|-----------------|-----------------|-----------------|----------------------------------------------------------------|---------------------------|-----------------------------------------|-----------------|--------------------------|--------------------------|-----------------|------------------------------|--------------------|----------------------------|------------------------|----------------------|--------------------|
|                                                                     | Weight (g)             | WATSC/BW        | WATPG/BW        | WATPR/BW        | TotalWAT/BW     | KIDNEYS/BW                                                     | HEART/BW                  | BAT/BW                                  | LIVER/BW        | Cholesterolemia (mmol/L) | Fasting Glycemia (mg/dL) | AUC (mg.min/dL) | Fasting Insulinemia (pmol/L) | Leptinemia (ng/mL) | Food Intake (Kcal/kg BW/d) | Hidden Cheese Test (s) | Olfactory Preference | EOG amplitude (mV) |
| Mean CTRL-CD whole population (n=14)                                | 28.58 ± 2.66           | 0.0253 ± 0.0082 | 0.0326 ± 0.0130 | 0.0135 ± 0.0056 | 0.0714 ± 0.0258 | 0.0117 ± 0.0020                                                | 0.0053 ± 0.0009           | 0.0051 ± 0.0015                         | 0.0341 ± 0.0136 | 2.961 ± 1.474            | 155.21 ± 15.30           | 21897 ± 2941    | 158.11 ± 61.90               | 7.31 ± 5.67        | 437.32 ± 79.00             | 212.29 ± 90.15         | 0.530 ± 0.294        | 16.388 ± 3.612     |
| Mean CTRL-CD individuals (n=6)                                      | 28.49 ± 2.94           | 0.0262 ± 0.0034 | 0.0355 ± 0.0117 | 0.0151 ± 0.0052 | 0.0767 ± 0.0194 | 0.0105 ± 0.0006                                                | 0.0048 ± 0.0004           | 0.0058 ± 0.0016                         | 0.0391 ± 0.0035 | 4.021 ± 0.489            | 159.67 ± 11.90           | 23654 ± 761     | 155.75 ± 34.69               | 8.79 ± 6.44        | 405.75 ± 30.37             | 190.00 ± 107.29        | 0.599 ± 0.350        | 15.292 ± 2.111     |
| Mean CTRL-HFD whole population (n=17)                               | 41.71 ± 5.46           | 0.0675 ± 0.0094 | 0.0575 ± 0.0162 | 0.0334 ± 0.0062 | 0.1584 ± 0.0157 | 0.0086 ± 0.0011                                                | 0.0041 ± 0.0007           | 0.0070 ± 0.0027                         | 0.0324 ± 0.0088 | 5.582 ± 1.486            | 192.53 ± 43.98           | 30781 ± 5424    | 632.89 ± 382.26              | 58.12 ± 19.31      | 325.21 ± 41.24             | 245.38 ± 88.60         | 0.68 ± 0.221         | 14.987 ± 1.818     |
| Mean CTRL-HFD individuals (n=6)                                     | 41.13 ± 4.75           | 0.0635 ± 0.0091 | 0.0604 ± 0.0143 | 0.0326 ± 0.0041 | 0.1565 ± 0.0083 | 0.0086 ± 0.0007                                                | 0.0041 ± 0.0005           | 0.0069 ± 0.0022                         | 0.0314 ± 0.0064 | 5.361 ± 1.456            | 175.90 ± 19.37           | 29920 ± 1608    | 596.13 ± 301.13              | 55.22 ± 21.87      | 331.05 ± 36.22             | 244.40 ± 79.84         | 0.562 ± 0.128        | 13.256 ± 0.659     |
| Mean OB-CD whole population (n=9)                                   | 28.97 ± 2.79           | 0.0233 ± 0.0046 | 0.0310 ± 0.0109 | 0.0115 ± 0.0031 | 0.0658 ± 0.0172 | 0.0126 ± 0.0017                                                | 0.0059 ± 0.0010           | 0.0047 ± 0.0009                         | 0.0347 ± 0.0069 | 3.005 ± 1.159            | 154.22 ± 17.77           | 21075 ± 2648    | 151.8 ± 38.98                | 5.97 ± 3.12        | 466.10 ± 79.21             | 202.89 ± 104.01        | 0.444 ± 0.266        | 14.234 ± 4.033     |
| Mean OB-CD individuals (n=6)                                        | 28.40 ± 2.28           | 0.0238 ± 0.0052 | 0.0333 ± 0.0116 | 0.0117 ± 0.0030 | 0.0689 ± 0.0180 | 0.0124 ± 0.0014                                                | 0.0056 ± 0.0011           | 0.0048 ± 0.0009                         | 0.0357 ± 0.0069 | 2.964 ± 1.222            | 155.42 ± 18.89           | 21541 ± 3014    | 163.69 ± 39.27               | 5.70 ± 3.24        | 452.24 ± 82.89             | 193.00 ± 106.02        | 0.419 ± 0.330        | 13.587 ± 4.498     |
| Mean OB-HFD whole population (n=9)                                  | 46.34 ± 2.79           | 0.0751 ± 0.0141 | 0.0487 ± 0.0074 | 0.0402 ± 0.0069 | 0.1640 ± 0.0197 | 0.0091 ± 0.0011                                                | 0.0042 ± 0.0008           | 0.0087 ± 0.0047                         | 0.0342 ± 0.0059 | 5.950 ± 1.842            | 198.83 ± 19.16           | 35913 ± 7126    | 667.91 ± 314.17              | 68.47 ± 15.31      | 311.72 ± 39.34             | 287.33 ± 38.00         | 0.611 ± 0.294        | 14.783 ± 2.530     |
| Mean OB-HFD individuals (n=6)                                       | 47.37 ± 1.85           | 0.0721 ± 0.0113 | 0.0476 ± 0.0062 | 0.0427 ± 0.0056 | 0.1624 ± 0.0134 | 0.0087 ± 0.0011                                                | 0.0038 ± 0.0007           | 0.0105 ± 0.0048                         | 0.0330 ± 0.0048 | 5.795 ± 2.206            | 198.25 ± 11.12           | 34724 ± 5184    | 786.72 ± 348.12              | 66.65 ± 18.05      | 313.23 ± 44.50             | 281.00 ± 46.54         | 0.561 ± 0.329        | 15.853 ± 0.945     |
| Mean WL-CD whole population (n=17)                                  | 27.44 ± 3.40           | 0.0249 ± 0.0076 | 0.0294 ± 0.0097 | 0.0127 ± 0.0076 | 0.0680 ± 0.0237 | 0.0107 ± 0.0011                                                | 0.0051 ± 0.0005           | 0.0049 ± 0.0016                         | 0.0350 ± 0.0043 | 3.114 ± 0.957            | 150.34 ± 23.43           | 21582 ± 3809    | 189.77 ± 80.06               | 7.79 ± 8.51        | 403.48 ± 49.23             | 149.63 ± 97.80         | 0.399 ± 0.395        | 14.445 ± 3.976     |
| Mean WL-CD individuals (n=6)                                        | 27.21 ± 1.99           | 0.0233 ± 0.0045 | 0.0275 ± 0.0042 | 0.0115 ± 0.0010 | 0.0647 ± 0.0068 | 0.0108 ± 0.0004                                                | 0.0051 ± 0.0004           | 0.0045 ± 0.0008                         | 0.0358 ± 0.0009 | 3.379 ± 0.562            | 149.50 ± 15.19           | 21465 ± 1585    | 154.32 ± 65.86               | 5.60 ± 2.89        | 412.31 ± 29.63             | 206.00 ± 106.62        | 0.469 ± 0.505        | 15.9841 ± 1.553    |
| Mean WL-HFD whole population (n=19)                                 | 41.31 ± 3.92           | 0.0658 ± 0.0099 | 0.0632 ± 0.0135 | 0.0308 ± 0.0062 | 0.1598 ± 0.0150 | 0.0083 ± 0.0006                                                | 0.0037 ± 0.0003           | 0.005 ± 0.0024                          | 0.0306 ± 0.0047 | 5.616 ± 1.337            | 185.89 ± 18.47           | 35228 ± 8740    | 522.70 ± 244.40              | 60.34 ± 23.86      | 326.89 ± 38.32             | 229.53 ± 101.53        | 0.423 ± 0.260        | 13.338 ± 4.243     |
| Mean WL-HFD individuals (n=6)                                       | 41.91 ± 4.06           | 0.0666 ± 0.0097 | 0.0672 ± 0.0150 | 0.0335 ± 0.0040 | 0.1674 ± 0.0124 | 0.0082 ± 0.0007                                                | 0.0036 ± 0.0004           | 0.0052 ± 0.0020                         | 0.0297 ± 0.0014 | 5.725 ± 0.775            | 184.08 ± 11.91           | 31750 ± 2995    | 467.16 ± 173.20              | 58.00 ± 18.76      | 333.01 ± 37.40             | 245.17 ± 102.08        | 0.335 ± 0.276        | NA                 |
| <i>pval</i> whole population maternal group (Panchenko et al, 2019) | 0.031                  | NS              | NS              | NS              | NS              | 0.028                                                          | 0.041<br>WL vs OB p=0.001 | NS                                      | NS              | NS                       | NS                       | NS              | NS                           | NS                 | NS                         | NS                     | NS                   | 0.012              |
| <i>pval</i> individuals maternal group                              | 0.03825<br>post-hoc NS | NS              | NS              | NS              | NS              | 0.0101<br>post-hoc<br>OB vs CTRL p=0.0312<br>WL vs OB p=0.0335 | NS                        | 0.0456<br>post-hoc<br>WL vs OB p=0.0355 | NS              | NS                       | NS                       | NS              | NS                           | NS                 | NS                         | NS                     | NS                   | NS                 |
| <i>pval</i> whole population HFD vs CD (Panchenko et al, 2019)      | <0.01                  | <0.01           | <0.01           | <0.01           | <0.01           | <0.01                                                          | <0.01                     | <0.01                                   | <0.01           | <0.01                    | <0.01                    | <0.01           | <0.01                        | <0.01              | <0.01                      | 2.00E-16               | NS                   | NS                 |
| mean CD individuals (n=18)                                          | 28.03 ± 2.36           | 0.0244 ± 0.0043 | 0.0321 ± 0.0098 | 0.0128 ± 0.0038 | 0.0704 ± 0.0160 | 0.0113 ± 0.0013                                                | 0.0052 ± 0.0007           | 0.0050 ± 0.0012                         | 0.0369 ± 0.0045 | 3.455 ± 0.896            | 154.86 ± 15.26           | 22264 ± 2183    | 157.58 ± 46.20               | 6.69 ± 4.48        | 423.43 ± 54.75             | 195.76 ± 100.00        | 0.497 ± 0.377        | 14.611 ± 3.304     |
| mean HFD individuals (n=18)                                         | 43.47 ± 4.54           | 0.0674 ± 0.0101 | 0.0584 ± 0.0144 | 0.0363 ± 0.0064 | 0.1621 ± 0.0118 | 0.0085 ± 0.0008                                                | 0.0039 ± 0.0006           | 0.0076 ± 0.0039                         | 0.0314 ± 0.0046 | 5.627 ± 1.506            | 186.68 ± 16.30           | 32261 ± 3991    | 615.38 ± 296.31              | 59.96 ± 19.11      | 325.76 ± 38.26             | 257.59 ± 76.45         | 0.561 ± 0.256        | 14.544 ± 1.842     |
| <i>pval</i> individuals HFD vs CD                                   | 5.748E-15              | <2e-16          | 2.893E-07       | 8.365E-15       | <2e-16          | 1.64E-09                                                       | 7.574E-07                 | 0.0075                                  | 9.60E-04        | 1.36E-05                 | 1.20E-06                 | 5.462E-10       | 6.164E-07                    | 1.054E-12          | 8.834E-07                  | 0.06044                | NS                   | NS                 |

### Supplementary figure S1: Selection of the individuals for LC-HRMS.

The Principal Component Analysis analyzing all the phenotypic characteristics listed in the supplementary table 1, allowed the selection of 6 males per group. Were selected the 6 individuals whose coordinates are closer to the barycenter of their own group (represented with an “x”) Each circle represents one individual, the color of which is according to its group in the legend. The plain circles represent the 6 selected individuals.

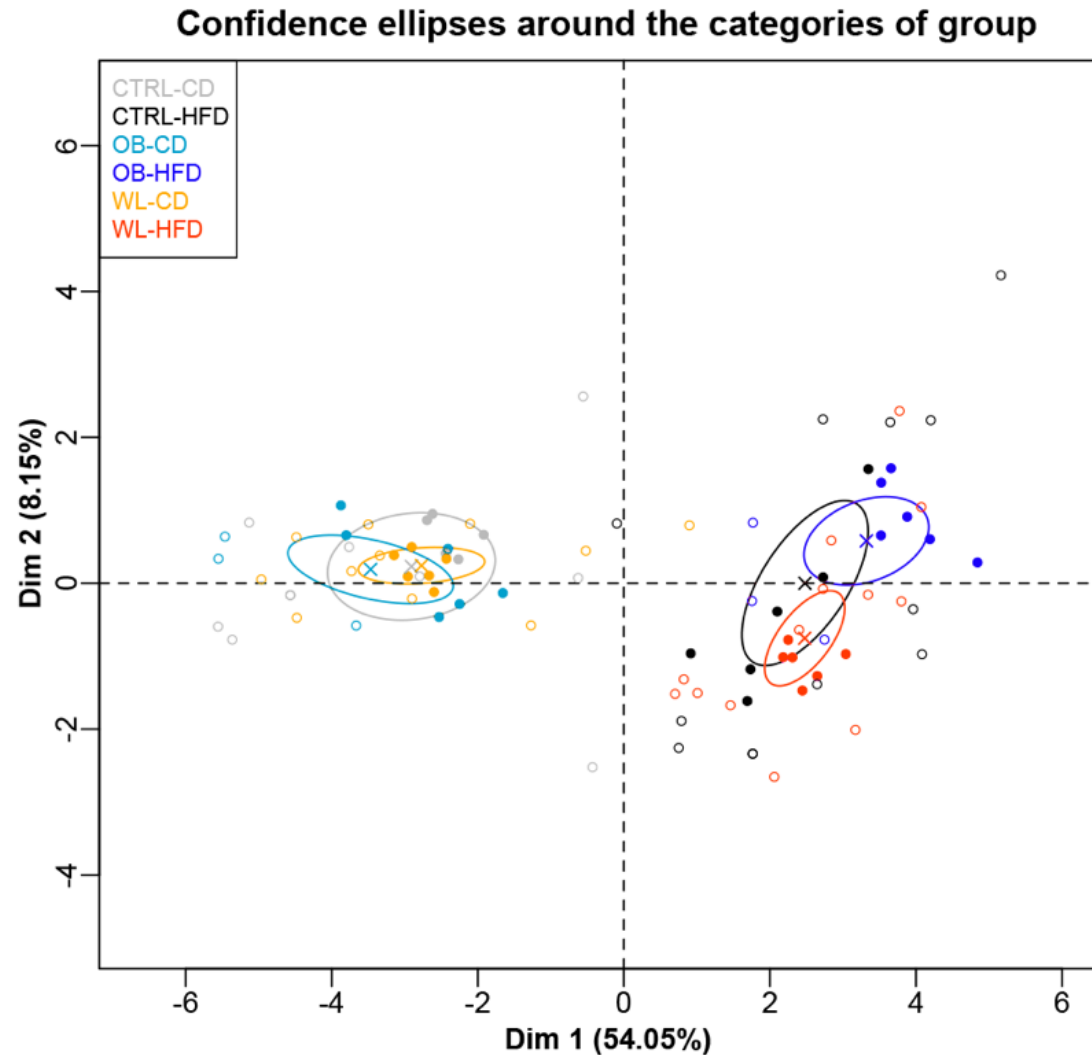

**Supplementary Figure S2: Score plots from the OPLS-DA classification, with one orthogonal component, into HFD and CD groups for the liver (a), hypothalamus (b) and whole olfactory bulb (c). A model is considered robust when the response variance explained (R2Y) is higher than the predictive performance of the model (Q2Y). For the olfactory bulb, the model is robust but have a low predictive performance (Q2Y<0.5)**

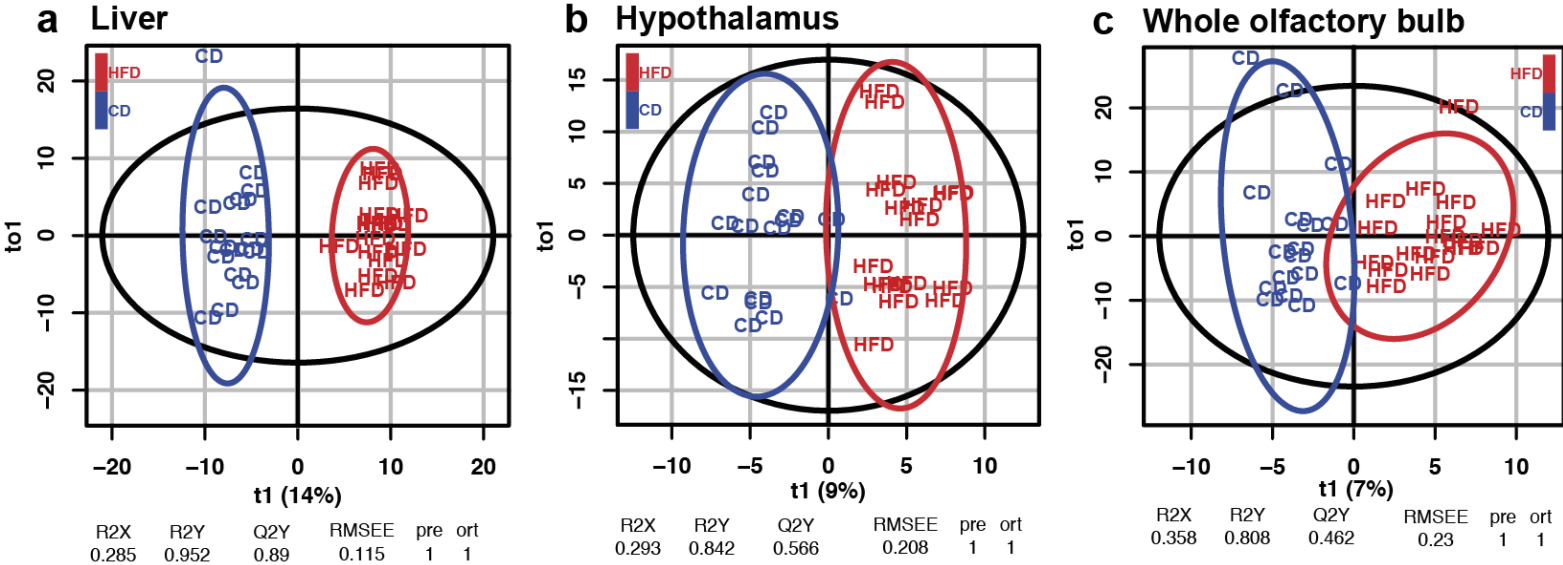

**Supplementary Figure S3:**  
**Between-tissue correlation for 1,5-Anhydroglucitol, Saccharopine and  $\beta$ -hydroxybutyrate**

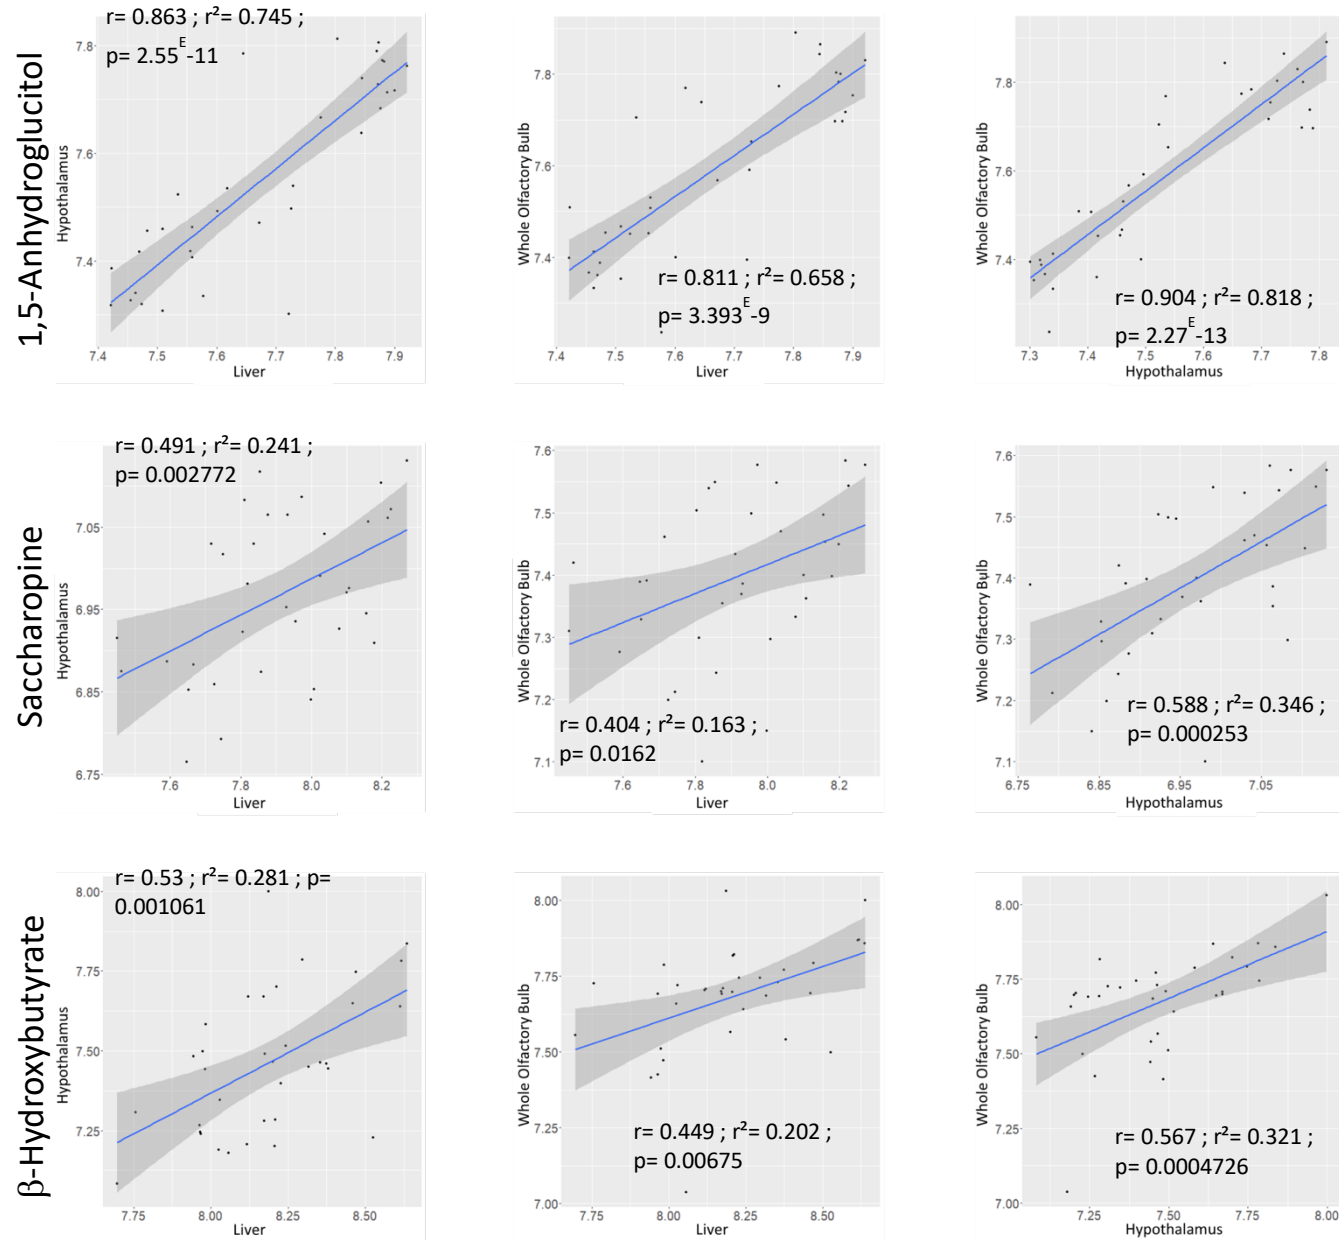

**Supplementary figure S4: Correlation between 1,5-anhydroglucitol signal and parameters of the glucose metabolism (fasting glycemia, fasting insulinemia and area-under-curve (AUC) for glycemia measured during an OGTT).**

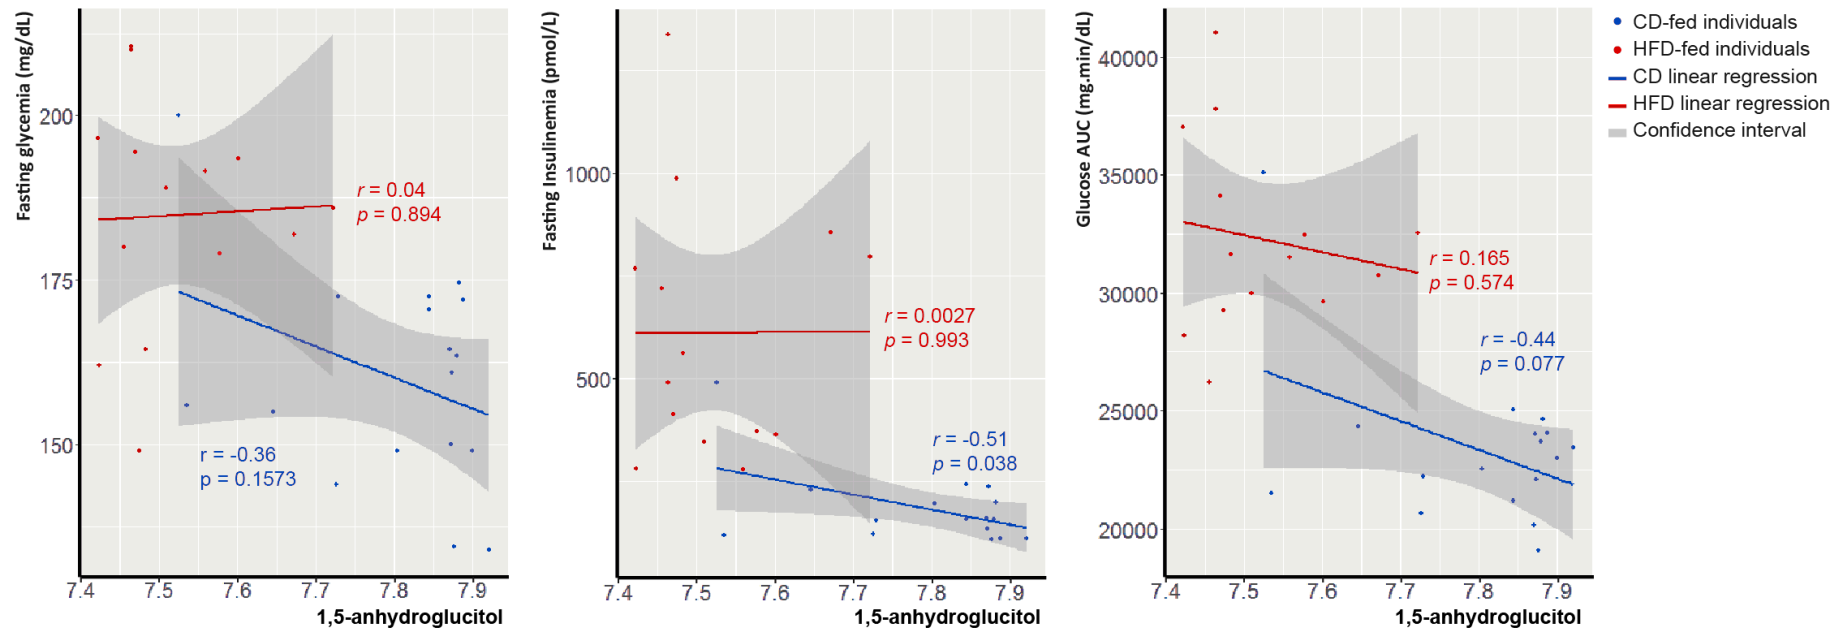

Supplement: s1 [file s1]
